# Supplementary material for: Synergistic effects of a novel free-standing reduced graphene oxide film and surface coating fibronectin on morphology, adhesion and proliferation of mesenchymal stem cells
Source: Royal Society of Chemistry journal article supplement (doi:10.1039/c5tb00295h), 2015-01-01
Supplement: c5tb00295h1.pdf [file c5tb00295h1.pdf]

Electronic Supplementary Information (ESI)

## Synergistic effects of a novel free-standing reduced graphene oxide film and surface coating fibronectin on morphology, adhesion and proliferation of mesenchymal stem cells

Lin Jin,<sup>a,b</sup> Zhiping Zeng,<sup>c</sup> Shreyas Kuddannaya,<sup>a</sup> Dan Yue,<sup>b</sup> Jingnan Bao,<sup>a</sup> Zhenling Wang<sup>\*b</sup>, Yilei Zhang,<sup>\*a</sup>

<sup>a</sup>School of Mechanical & Aerospace Engineering, Nanyang Technological University, 50 Nanyang Avenue, Singapore 639798, Singapore

<sup>b</sup>The Key Laboratory of Rare Earth Functional Materials and Applications, Zhoukou Normal University, Zhoukou 466001, P. R. China

<sup>c</sup>School of Chemical & Biomedical Engineering, Nanyang Technological University, 62 Nanyang Avenue, Singapore 637459, Singapore

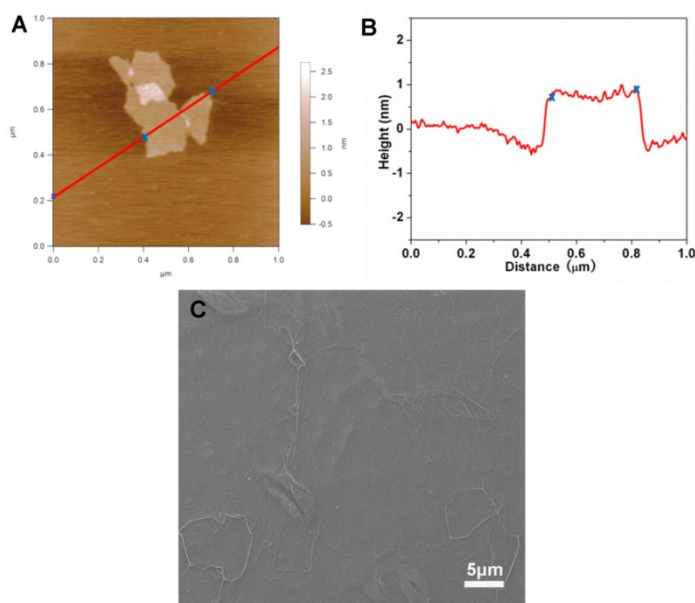

**Figure S1.** Morphology of GO sheets. (A) Typical AFM image of GO sheets from the aqueous solution, (B) the corresponding height profile of the GO sheets, (C) SEM image of the GO sheets.
